# Supplementary material
Source: Springer Nature journal article supplement (https://www.springermedizin.de/resource/supplementary/12891_2011_1234_MOESM3_ESM.pdf/9507414)

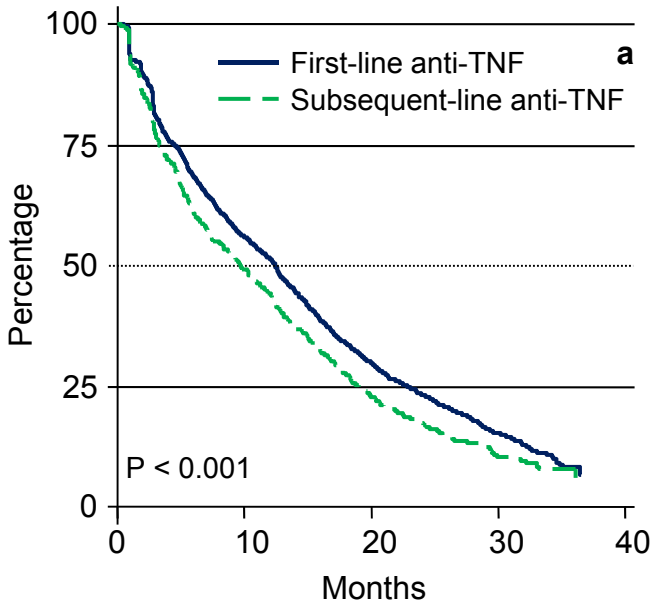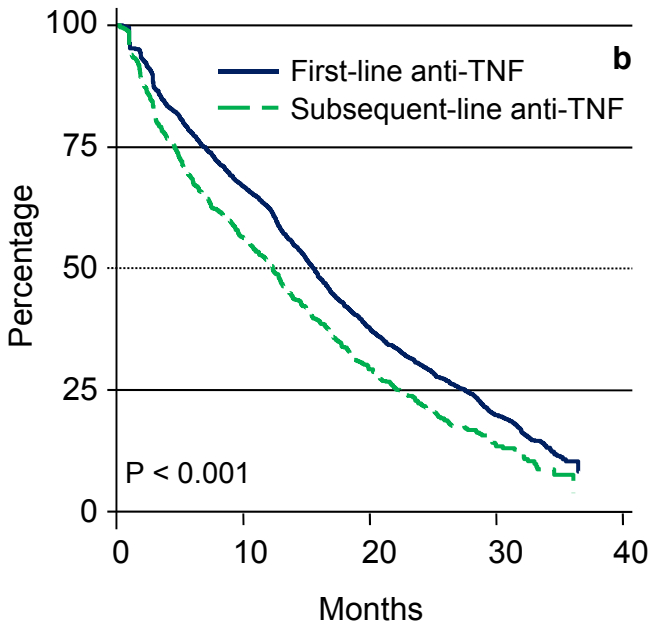

Supplement: MOESM3 [file 9507414]
